# Supplementary material
Source: publisher site journal article supplement (https://www.dovepress.com/article/278306)
Supplement: Supplementary file 1 [file get_supplementary_file.php]

Table e-1. Definitions for exclusion criteria.

| Definition                                                                      | ICD-code/ATC-code/other code                                                                                           | Measurement period                                                                                                                    | Data source                                      |
|---------------------------------------------------------------------------------|------------------------------------------------------------------------------------------------------------------------|---------------------------------------------------------------------------------------------------------------------------------------|--------------------------------------------------|
| Use of antiepileptic medication                                                 | ATC: N03A                                                                                                              | Within one year prior to index date to ascertain incident use; any time after index date (including index date) to ascertain exposure | PR                                               |
| Hip fracture                                                                    | Hospitalization (ICD-10: S72.0, S72.1, S72.2, ICD-9: 820, ICD-8: 82000, 82010, 82090, 82001, 82011 and 82091)          | Within one year prior to index date                                                                                                   | FCR                                              |
| Long-term hospitalization/<br>institutionalization                              | Hospitalized or institutionalized over 50% of the period or an ongoing stay of $\geq 90$ days at the end of the period | Within one year prior to index date                                                                                                   | FCR combined with register maintained by the SII |
| Ongoing hospitalization/<br>institutionalization $\geq 90$ days at cohort entry |                                                                                                                        |                                                                                                                                       | FCR combined with register maintained by the SII |
| Active cancer                                                                   |                                                                                                                        | Within one year prior to index date                                                                                                   | FCR, PR                                          |
| Death                                                                           |                                                                                                                        |                                                                                                                                       | SF                                               |

Index date is the date of the first dispensation of an AED after AD diagnosis for incident users and the matched date for non-users. Abbreviations: ATC, Anatomical Therapeutic Chemical; FCR, Finnish Care Register; ICD, International Classification of Diseases; PR, Prescription Register; SF, Statistics Finland; SII, Social Insurance Institution of Finland.

Table e-2. Definitions and classifications of baseline covariates.

| <b>Socio-demographic and socio-economic factors</b> | <b>Classification</b>                                                                                                                                                                                    | <b>Measurement</b>                                                                               | <b>Data source</b> |
|-----------------------------------------------------|----------------------------------------------------------------------------------------------------------------------------------------------------------------------------------------------------------|--------------------------------------------------------------------------------------------------|--------------------|
| Age (years)                                         | ≤ 64<br>65-74<br>75-84<br>≥ 85                                                                                                                                                                           | At cohort entry                                                                                  | PR                 |
| Gender                                              | Male<br>Female                                                                                                                                                                                           | NA                                                                                               | PR                 |
| University hospital catchment area                  | Helsinki<br>Turku<br>Tampere<br>Kuopio<br>Oulu                                                                                                                                                           | Baseline                                                                                         | SF                 |
| Occupational socioeconomic position                 | Managerial/professional<br>Office<br>Farming/forestry<br>Sales, industrial, cleaning<br>Unknown and those with missing data at Statistics Finland                                                        | Highest position recorded since 1972 up to 3 years prior to the diagnosis of Alzheimer's disease | SF                 |
| <b>Medication used at baseline</b>                  | <b>ATC code</b>                                                                                                                                                                                          | <b>Measurement period</b>                                                                        | <b>Data source</b> |
| Antidepressants                                     | N06A                                                                                                                                                                                                     | Within 12 months prior to index date                                                             | PR                 |
| Benzodiazepines and related drugs                   | Benzodiazepines N05BA, N05CD and/or Z-drugs N05CF                                                                                                                                                        | Within 12 months prior to index date                                                             | PR                 |
| Antipsychotics                                      | N05A                                                                                                                                                                                                     | Within 12 months prior to index date                                                             | PR                 |
| Opioids                                             | N02A                                                                                                                                                                                                     | Within 12 months prior to index date                                                             | PR                 |
| Memantine                                           | N06DX01                                                                                                                                                                                                  | Within 12 months prior to index date                                                             | PR                 |
| Antiparkinsonians                                   | N04A, N04B                                                                                                                                                                                               | Within 12 months prior to index date                                                             | PR                 |
| Other drugs                                         | C01B                                                                                                                                                                                                     | Within 12 months prior to index date                                                             | PR                 |
| Cardiovascular drugs                                | Cardiac glycosides (C01AA), antiarrhythmics (C01B), organic nitrates (C01DA), diuretics (C03), beta blocking agents (C07), calcium channel blockers (C08), agents acting on the renin-angiotensin system | Within 12 months prior to index date                                                             | PR                 |

|                                              |                                                                                                                                                                                                                                                                                                                                                                                                                                                                                                               |                                                                                                       |                    |
|----------------------------------------------|---------------------------------------------------------------------------------------------------------------------------------------------------------------------------------------------------------------------------------------------------------------------------------------------------------------------------------------------------------------------------------------------------------------------------------------------------------------------------------------------------------------|-------------------------------------------------------------------------------------------------------|--------------------|
|                                              | (C09), lipid modifying agents (C10A, C10BA), antithrombotic agents (B01A). C01DA                                                                                                                                                                                                                                                                                                                                                                                                                              |                                                                                                       |                    |
| Corticosteroids, systemic                    | H02A, H02B, H02C                                                                                                                                                                                                                                                                                                                                                                                                                                                                                              | Within 12 months prior to index date                                                                  | PR                 |
| PPIs                                         | A02BC                                                                                                                                                                                                                                                                                                                                                                                                                                                                                                         | Within 12 months prior to index date                                                                  | PR                 |
| NSAIDs                                       | M01A, M01AX05                                                                                                                                                                                                                                                                                                                                                                                                                                                                                                 | Within 12 months prior to index date                                                                  | PR                 |
| Drugs for urinary frequency and incontinence | G04BD                                                                                                                                                                                                                                                                                                                                                                                                                                                                                                         | Within 12 months prior to index date                                                                  | PR                 |
| Estrogens                                    | G03GC                                                                                                                                                                                                                                                                                                                                                                                                                                                                                                         | Within 12 months prior to index date                                                                  | PR                 |
| <b>Health conditions at baseline</b>         | <b>ICD-10 code or Classification number</b>                                                                                                                                                                                                                                                                                                                                                                                                                                                                   | <b>Measurement period</b>                                                                             | <b>Data source</b> |
| Psychiatric and neurological                 |                                                                                                                                                                                                                                                                                                                                                                                                                                                                                                               |                                                                                                       |                    |
| Depression                                   | Hospitalization (ICD-10: F32-F34, F38-F39, ICD-9: 2961, 2968, 3011, 3004, ICD-8: 3004, 3011, 2960)                                                                                                                                                                                                                                                                                                                                                                                                            | Diagnosed since 1972 until index date                                                                 | FCR                |
| Schizophrenia                                | Hospitalization (ICD-10: F20 to F29)                                                                                                                                                                                                                                                                                                                                                                                                                                                                          | Diagnosed since 1996 until index date                                                                 |                    |
| Epilepsy                                     | Special reimbursement (classification number 111)                                                                                                                                                                                                                                                                                                                                                                                                                                                             | Diagnosed since 1972 until the index date                                                             | SRR                |
| Related to HF                                |                                                                                                                                                                                                                                                                                                                                                                                                                                                                                                               |                                                                                                       |                    |
| Osteoporosis                                 | Hospitalization (ICD-10: M80, M81), use of drugs for osteoporosis, ever (M05BA, M05BB, M05BC, M05BX)                                                                                                                                                                                                                                                                                                                                                                                                          | Diagnosed since 1972 until index date in FCR or purchased ever since 1995 before index date in the PR | FCR, PR            |
| Vision disturbances                          | Hospitalization [ICD-10: cataract (H25, H26, H27, H280), degeneration of macula and posterior pole (H353), glaucoma (H400, H401, H402, H403, H404, H405, H406, H408, H409, H420, H428)]                                                                                                                                                                                                                                                                                                                       | Diagnosed since 1996 until index date in FCR                                                          | FCR                |
| Alcohol abuse                                | Hospitalization [ICD-10: Alcoholic psychosis (F10.3-F10.9), alcohol abuse (F10.0, F10.1), alcohol dependence syndrome (F10.2), alcohol polyneuropathy (G62.1), degeneration of nervous system due to alcohol (G31.2), alcoholic myopathy (G72.1), alcohol (I42.6), alcoholic gastritis (K29.2), alcoholic liver disease (K70-K70.4, K70.9), fetal alcohol syndrome (Q86.0), alcohol-induced chronic pancreatitis (K86.0), alcohol poisoning (X45, Y15, T51.0, T51.1, T51.9), excessive blood level of alcohol | Diagnosed since 1996 until index date in FCR or purchased ever since 1995 before index date in the PR | FCR, PR            |

|                         |                                                                                                                                                                                                                                                                                                                                                                                                                                                                                                                                                                                                                                                                                 |                                                                                                       |          |
|-------------------------|---------------------------------------------------------------------------------------------------------------------------------------------------------------------------------------------------------------------------------------------------------------------------------------------------------------------------------------------------------------------------------------------------------------------------------------------------------------------------------------------------------------------------------------------------------------------------------------------------------------------------------------------------------------------------------|-------------------------------------------------------------------------------------------------------|----------|
|                         | (R78.0)], use of drugs for addiction, ever (N07BB, N07BC)                                                                                                                                                                                                                                                                                                                                                                                                                                                                                                                                                                                                                       |                                                                                                       |          |
| Any fracture            | Hospitalization (ICD-10: S*2, T02)                                                                                                                                                                                                                                                                                                                                                                                                                                                                                                                                                                                                                                              | Diagnosed since 1996 until index date                                                                 | FCR      |
| Head trauma             | Hospitalization (ICD-10: S0* (Injuries to the head))                                                                                                                                                                                                                                                                                                                                                                                                                                                                                                                                                                                                                            | Diagnosed since 1996 until index date                                                                 | FCR      |
| Rheumatoid arthritis    | Hospitalization (ICD-10: M05, M06, M45) or special reimbursement (classification number 202)                                                                                                                                                                                                                                                                                                                                                                                                                                                                                                                                                                                    | Diagnosed since 1996 until index date in the FCR or since 1972 until index date in the SRR            | FCR, SRR |
| Other conditions        |                                                                                                                                                                                                                                                                                                                                                                                                                                                                                                                                                                                                                                                                                 |                                                                                                       |          |
| Any cancer              | Hospitalization (ICD-10: C00-C97, Z85, ICD-9: 140-195, 2730, 2733, V1046, 200-208)                                                                                                                                                                                                                                                                                                                                                                                                                                                                                                                                                                                              | Diagnosed since 1987 until index date                                                                 | FCR      |
| Cardiovascular diseases | Hypertension [hospitalization (ICD-10: I10-I15) or special reimbursement (classification number 205)], heart failure [hospitalization (ICD-10: I42-43, I50, I11.0) or special reimbursement (classification number 201)], peripheral arterial disease [hospitalization (ICD-10: I70, I71.2, I71.4, I71.6, I71.9, I73, I77, I79, K55.1, K55.9, Z95.8, ICD-9: 4400-4409, 4412, 4414, 4417, 4419, 4431-4439, 4471, 5571, 5579, V434)], atrial fibrillation [hospitalization (ICD-10: I48)], coronary artery disease [hospitalization (ICD-10: I20-I25, NOMESCO: FNA, FNC, FNE, FNG00, FNG10, FN1AT, FN1BT, FN1YT) or special reimbursement (classification numbers 206, 213, 280)] | Diagnosed since 1996 until index date                                                                 | FCR, SRR |
| Stroke                  | Hospitalization (ICD-10: I60-64, I69, ICD-9: 430-432, 4360, 4380A, 4330A, 4331A, 4339A, 4349A, 4340A, 4341A, ICD-8: 430-434)                                                                                                                                                                                                                                                                                                                                                                                                                                                                                                                                                    | Diagnosed since 1972 until index date                                                                 | FCR      |
| Diabetes                | Diabetes medication (ATC: A10, excluding A10BX01 guar gum), or special reimbursement for diabetes (classification number 103)                                                                                                                                                                                                                                                                                                                                                                                                                                                                                                                                                   | At least 1 purchase prior to index date in the PR or diagnosed since 1972 until index date in the SRR | PR, SRR  |
| Asthma/COPD             | Hospitalization (ICD-10: J44, J45, J46), or special reimbursement (classification numbers 203)                                                                                                                                                                                                                                                                                                                                                                                                                                                                                                                                                                                  | Diagnosed since 1996 until index date in the FCR or since 1972 until index date in the SRR            | FCR, SRR |
| Chronic liver disease   | Hospitalization (ICD-10: B18, K70, K73, K74, K754, K76, ICD-9: 07032, 07033, 07054, 4560, 4561, 45620, 45621, 5710, 5712, 5713, 57140, 57149, 5715, 5716, 5718, 5719, 5723, 5728, V427)                                                                                                                                                                                                                                                                                                                                                                                                                                                                                         | Diagnosed since 1987 until index date                                                                 | FCR      |

|                       |                                                                                                                                                                                              |                                                                                            |          |
|-----------------------|----------------------------------------------------------------------------------------------------------------------------------------------------------------------------------------------|--------------------------------------------------------------------------------------------|----------|
| Chronic renal disease | Hospitalization (ICD-10: I13.1, N18, N19, Z94.0, Z99.2, Z49, ICD-9: 40311, 40391, 40412, 40492, 585, 586, V420, V451, V560, V568) or special reimbursement (classification numbers 137, 138) | Diagnosed since 1987 until index date in the FCR or since 1972 until index date in the SRR | FCR, SRR |
|-----------------------|----------------------------------------------------------------------------------------------------------------------------------------------------------------------------------------------|--------------------------------------------------------------------------------------------|----------|

Index date is the date of the first dispensation of an AED after AD diagnosis for incident users and the matched date for non-users. Abbreviations: AD, Alzheimer's disease; ATC, Anatomical Therapeutic Chemical; COPD, chronic obstructive pulmonary disease; FCR, Finnish Care Register; ICD, International Classification of Diseases; PR, Prescription Register; SF, Statistics Finland; SRR, Special Reimbursement Register.

Figure 1. Study design.

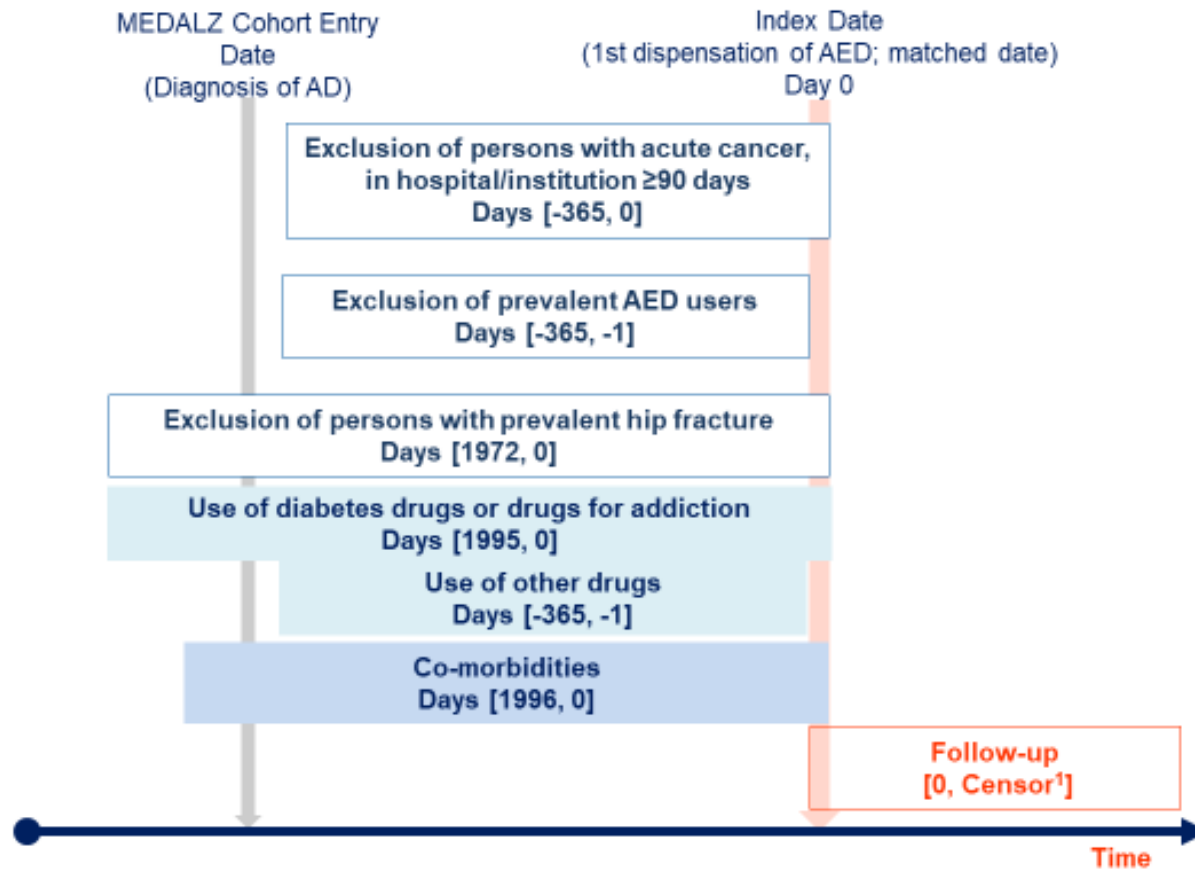

1. Earliest of: incident hip fracture, AED discontinuation (for users), AED initiation (for non-users), death, disenrollment, start of continuous hospitalization/institutionalization lasting  $>90$  days, study end date (December 31, 2015)
